# Supplementary material for: Highly selective aerobic oxidation of methane to methanol over gold decorated zinc oxide via photocatalysis
Source: Royal Society of Chemistry journal article supplement (doi:10.1039/d0ta02793f), 2020-01-01
Supplement: d0ta02793f1.pdf [file d0ta02793f1.pdf]

## Supplementary Information

Highly selective aerobic oxidation of methane to methanol over gold decorated zinc oxide via photocatalysis

Wencai Zhou,<sup>a</sup> Xueying Qiu,<sup>a</sup> Yuheng Jiang,<sup>a</sup> Yingying Fan,<sup>\*ab</sup> Shilei Wei,<sup>b</sup> Dongxue Han,<sup>\*b</sup> Li Niu,<sup>b</sup> Zhiyong Tang<sup>a</sup>

\*Corresponding author. Email: dxhan@gzhu.edu.cn; ccyfan@gzhu.edu.cn

<sup>a</sup>Chinese Academy of Sciences (CAS) Key Laboratory of Nanosystem and Hierarchy Fabrication, CAS Center for Excellence in Nanoscience, National Center for Nanoscience and Technology, Beijing 100190, China.

<sup>b</sup>Center for Advanced Analytical Science, School of Chemistry and Chemical Engineering c/o School of Civil Engineering, Guangzhou University, Guangzhou 510006, P. R. China.

|                                              |         |                                      |                 |                    |                  |             |          |           |             |
|----------------------------------------------|---------|--------------------------------------|-----------------|--------------------|------------------|-------------|----------|-----------|-------------|
| Sample ID:                                   | 1       | <b>1.30 mg Au<sub>0.08</sub>/ZnO</b> |                 |                    |                  |             |          | <b>a</b>  |             |
| Replicates                                   | 1       |                                      |                 |                    |                  |             |          |           |             |
| Replicate                                    | 1       |                                      |                 |                    |                  |             |          |           |             |
| IS                                           | Analyte | Mass                                 | Meas. Intensity | Net Intensity      | Concentration    | Sample Unit |          |           |             |
|                                              | Au      | 197                                  | 1595.4          | 1289.641           | 0.1              | ug/L        |          |           |             |
| Replicate                                    | 2       |                                      |                 |                    |                  |             |          |           |             |
| IS                                           | Analyte | Mass                                 | Meas. Intensity | Net Intensity      | Concentration    | Sample Unit |          |           |             |
|                                              | Au      | 197                                  | 1650.1          | 1344.314           | 0.11             | ug/L        |          |           |             |
| Replicate                                    | 3       |                                      |                 |                    |                  |             |          |           |             |
| IS                                           | Analyte | Mass                                 | Meas. Intensity | Net Intensity      | Concentration    | Sample Unit |          |           |             |
|                                              | Au      | 197                                  | 1676.1          | 1370.317           | 0.11             | ug/L        |          |           |             |
| Summary                                      | IS      | Analyte                              | Mass            | Meas. Intens. Mean | Net Intens. Mean | Conc. Mean  | Conc. SD | Conc. RSD | Report Unit |
|                                              |         | Au                                   | 197             | 1640.5             | 1334.8           | 0.11        | 0.003    | 3.09      | ug/L        |
| Quantitative Analysis - Comprehensive Report |         |                                      |                 |                    |                  |             |          |           |             |
| Sample ID:                                   | 2       | <b>1.60 mg Au<sub>0.15</sub>/ZnO</b> |                 |                    |                  |             |          | <b>b</b>  |             |
| Replicates                                   | 1       |                                      |                 |                    |                  |             |          |           |             |
| Replicate                                    | 1       |                                      |                 |                    |                  |             |          |           |             |
| IS                                           | Analyte | Mass                                 | Meas. Intensity | Net Intensity      | Concentration    | Sample Unit |          |           |             |
|                                              | Au      | 197                                  | 3558.4          | 3252.662           | 0.26             | ug/L        |          |           |             |
| Replicate                                    | 2       |                                      |                 |                    |                  |             |          |           |             |
| IS                                           | Analyte | Mass                                 | Meas. Intensity | Net Intensity      | Concentration    | Sample Unit |          |           |             |
|                                              | Au      | 197                                  | 3260.4          | 2954.591           | 0.23             | ug/L        |          |           |             |
| Replicate                                    | 3       |                                      |                 |                    |                  |             |          |           |             |
| IS                                           | Analyte | Mass                                 | Meas. Intensity | Net Intensity      | Concentration    | Sample Unit |          |           |             |
|                                              | Au      | 197                                  | 3321.7          | 3015.938           | 0.24             | ug/L        |          |           |             |
| Summary                                      | IS      | Analyte                              | Mass            | Meas. Intens. Mean | Net Intens. Mean | Conc. Mean  | Conc. SD | Conc. RSD | Report Unit |
|                                              |         | Au                                   | 197             | 3380.2             | 3074.4           | 0.24        | 0.012    | 5.12      | ug/L        |
| Quantitative Analysis - Comprehensive Report |         |                                      |                 |                    |                  |             |          |           |             |
| Sample ID:                                   | 3       | <b>3.88 mg Au<sub>0.30</sub>/ZnO</b> |                 |                    |                  |             |          | <b>c</b>  |             |
| Replicates                                   | 1       |                                      |                 |                    |                  |             |          |           |             |
| Replicate                                    | 1       |                                      |                 |                    |                  |             |          |           |             |
| IS                                           | Analyte | Mass                                 | Meas. Intensity | Net Intensity      | Concentration    | Sample Unit |          |           |             |
|                                              | Au      | 197                                  | 15254.8         | 14949.026          | 1.18             | ug/L        |          |           |             |
| Replicate                                    | 2       |                                      |                 |                    |                  |             |          |           |             |
| IS                                           | Analyte | Mass                                 | Meas. Intensity | Net Intensity      | Concentration    | Sample Unit |          |           |             |
|                                              | Au      | 197                                  | 15432.3         | 15126.55           | 1.19             | ug/L        |          |           |             |
| Replicate                                    | 3       |                                      |                 |                    |                  |             |          |           |             |
| IS                                           | Analyte | Mass                                 | Meas. Intensity | Net Intensity      | Concentration    | Sample Unit |          |           |             |
|                                              | Au      | 197                                  | 15252.1         | 14946.357          | 1.18             | ug/L        |          |           |             |
| Summary                                      | IS      | Analyte                              | Mass            | Meas. Intens. Mean | Net Intens. Mean | Conc. Mean  | Conc. SD | Conc. RSD | Report Unit |
|                                              |         | Au                                   | 197             | 15313.1            | 15007.3          | 1.18        | 0.008    | 0.69      | ug/L        |
| Quantitative Analysis - Comprehensive Report |         |                                      |                 |                    |                  |             |          |           |             |
| Sample ID:                                   | 4       | <b>1.56 mg Au<sub>0.75</sub>/ZnO</b> |                 |                    |                  |             |          | <b>d</b>  |             |
| Replicates                                   | 1       |                                      |                 |                    |                  |             |          |           |             |
| Replicate                                    | 1       |                                      |                 |                    |                  |             |          |           |             |
| IS                                           | Analyte | Mass                                 | Meas. Intensity | Net Intensity      | Concentration    | Sample Unit |          |           |             |
|                                              | Au      | 197                                  | 14757.6         | 14451.838          | 1.14             | ug/L        |          |           |             |
| Replicate                                    | 2       |                                      |                 |                    |                  |             |          |           |             |
| IS                                           | Analyte | Mass                                 | Meas. Intensity | Net Intensity      | Concentration    | Sample Unit |          |           |             |
|                                              | Au      | 197                                  | 14444.6         | 14138.851          | 1.11             | ug/L        |          |           |             |
| Replicate                                    | 3       |                                      |                 |                    |                  |             |          |           |             |
| IS                                           | Analyte | Mass                                 | Meas. Intensity | Net Intensity      | Concentration    | Sample Unit |          |           |             |
|                                              | Au      | 197                                  | 14329.2         | 14023.402          | 1.1              | ug/L        |          |           |             |
| Summary                                      | IS      | Analyte                              | Mass            | Meas. Intens. Mean | Net Intens. Mean | Conc. Mean  | Conc. SD | Conc. RSD | Report Unit |
|                                              |         | Au                                   | 197             | 14510.5            | 14204.7          | 1.12        | 0.017    | 1.56      | ug/L        |
| Quantitative Analysis - Comprehensive Report |         |                                      |                 |                    |                  |             |          |           |             |
| Sample ID:                                   | 5       | <b>2.24 mg Au<sub>1.57</sub>/ZnO</b> |                 |                    |                  |             |          | <b>e</b>  |             |
| Replicates                                   | 1       |                                      |                 |                    |                  |             |          |           |             |
| Replicate                                    | 1       |                                      |                 |                    |                  |             |          |           |             |
| IS                                           | Analyte | Mass                                 | Meas. Intensity | Net Intensity      | Concentration    | Sample Unit |          |           |             |
|                                              | Au      | 197                                  | 44631.6         | 44325.83           | 3.49             | ug/L        |          |           |             |
| Replicate                                    | 2       |                                      |                 |                    |                  |             |          |           |             |
| IS                                           | Analyte | Mass                                 | Meas. Intensity | Net Intensity      | Concentration    | Sample Unit |          |           |             |
|                                              | Au      | 197                                  | 44079.2         | 43773.452          | 3.45             | ug/L        |          |           |             |
| Replicate                                    | 3       |                                      |                 |                    |                  |             |          |           |             |
| IS                                           | Analyte | Mass                                 | Meas. Intensity | Net Intensity      | Concentration    | Sample Unit |          |           |             |
|                                              | Au      | 197                                  | 44095.3         | 43789.501          | 3.45             | ug/L        |          |           |             |
| Summary                                      | IS      | Analyte                              | Mass            | Meas. Intens. Mean | Net Intens. Mean | Conc. Mean  | Conc. SD | Conc. RSD | Report Unit |
|                                              |         | Au                                   | 197             | 44268.7            | 43962.9          | 3.46        | 0.025    | 0.72      | ug/L        |
| Quantitative Analysis - Comprehensive Report |         |                                      |                 |                    |                  |             |          |           |             |
| Sample ID:                                   | Au1.79  | <b>3.59 mg Au<sub>1.79</sub>/ZnO</b> |                 |                    |                  |             |          | <b>f</b>  |             |
| Replicates                                   | 1       |                                      |                 |                    |                  |             |          |           |             |
| Replicate                                    | 1       |                                      |                 |                    |                  |             |          |           |             |
| IS                                           | Analyte | Mass                                 | Meas. Intensity | Net Intensity      | Concentration    | Sample Unit |          |           |             |
|                                              | Au      | 197                                  | 79790.2         | 79484.425          | 6.26             | ug/L        |          |           |             |
| Replicate                                    | 2       |                                      |                 |                    |                  |             |          |           |             |
| IS                                           | Analyte | Mass                                 | Meas. Intensity | Net Intensity      | Concentration    | Sample Unit |          |           |             |
|                                              | Au      | 197                                  | 81566.2         | 81260.413          | 6.4              | ug/L        |          |           |             |
| Replicate                                    | 3       |                                      |                 |                    |                  |             |          |           |             |
| IS                                           | Analyte | Mass                                 | Meas. Intensity | Net Intensity      | Concentration    | Sample Unit |          |           |             |
|                                              | Au      | 197                                  | 80830.7         | 80524.917          | 6.34             | ug/L        |          |           |             |
| Summary                                      | IS      | Analyte                              | Mass            | Meas. Intens. Mean | Net Intens. Mean | Conc. Mean  | Conc. SD | Conc. RSD | Report Unit |
|                                              |         | Au                                   | 197             | 80729              | 80423.3          | 6.33        | 0.07     | 1.11      | ug/L        |

Fig. S1 ICP-OES results of the samples. (a) 1.30 mg of Au<sub>0.08</sub>/ZnO, (b) 1.60 mg of Au<sub>0.15</sub>/ZnO, (c) 3.88 mg of Au<sub>0.3</sub>/ZnO, (d) 1.56 mg of Au<sub>0.75</sub>/ZnO, (e) 2.24 mg of Au<sub>1.57</sub>/ZnO and (f) 3.59 mg of Au<sub>1.79</sub>/ZnO were dissolved in the mixed acid solutions for the concentration tests of Au species.

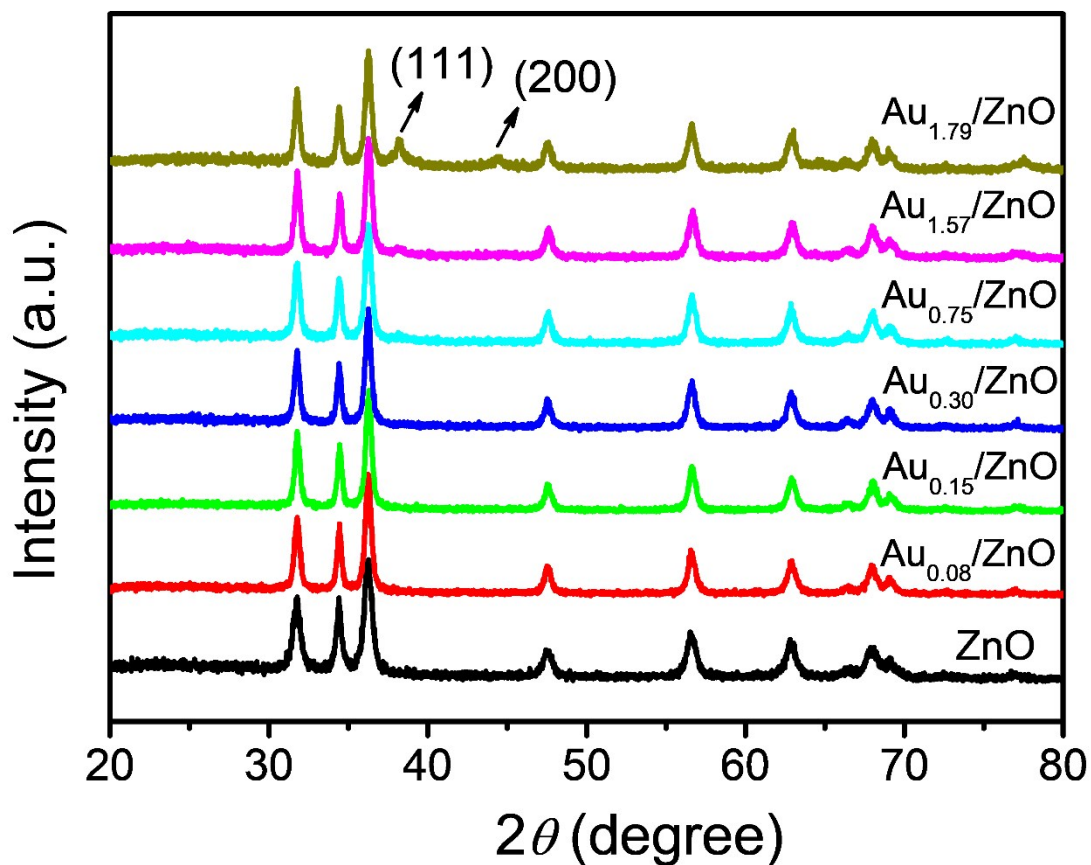

Fig. S2 XRD patterns of  $\text{Au}_x/\text{ZnO}$  ( $x = 0, 0.08, 0.15, 0.30, 0.75, 1.57$  and  $1.79$ ).

To investigate the influences for crystal types by Au loading amounts, XRD patterns of  $\text{Au}_x/\text{ZnO}$  ( $x = 0, 0.08, 0.15, 0.30, 0.75, 1.57$  and  $1.79$ ) are tested as shown in Fig.S2. However, in the cases of  $\text{Au}_x/\text{ZnO}$  ( $x = 0.08, 0.15, 0.30, 0.75$  and  $1.57$ ), merely ZnO crystal peaks with no observation of Au are detected, which may be attributed to the trace loading amounts of Au. Until enhancing the Au loading amount to 1.79 %, obvious XRD peaks on Au (111) and Au (200) emerge as convincing proofs for Au deposition. Meanwhile, ZnO also remains the intact crystal structure in the sample of  $\text{Au}_{1.79}/\text{ZnO}$ .

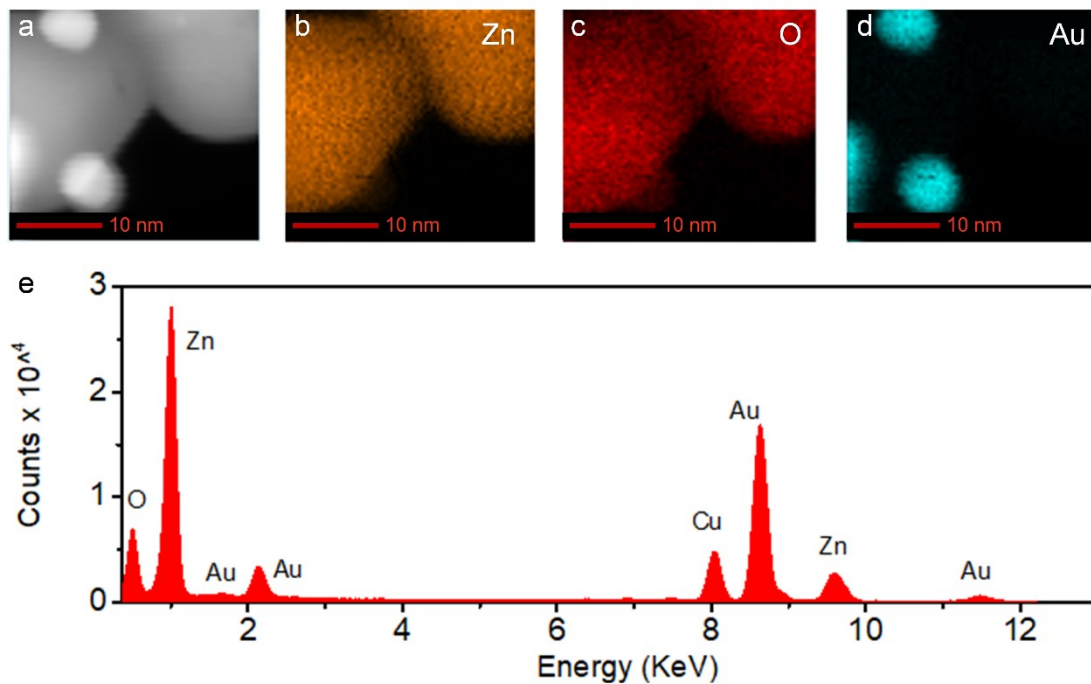

Fig. S3 (a) HAADF-STEM image and (b-d) corresponding element mapping of (b) Zn, (c) O and (d) Au over Au<sub>0.75</sub>/ZnO. (e) EDX spectroscopy of Au<sub>0.75</sub>/ZnO.

The successful synthesis of Au<sub>0.75</sub>/ZnO can also be verified by the elements distributions of Zn (Fig. S3b), O (Fig. S3c) and Au (Fig. S3d) from the element mapping by high-angle annular dark field scanning transmission electron microscope (HAADF-STEM, Fig. S3a) and energy dispersive X-ray (EDX) spectroscopy (Fig. S3e).

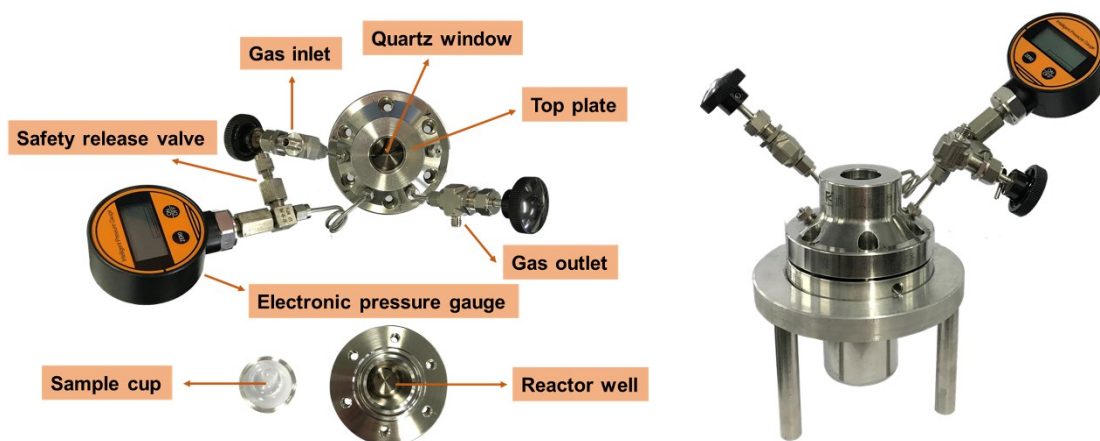

Fig. S4 Detailed configurations of high-pressure photocatalytic reactor for photocatalytic  $\text{CH}_4$  oxidation.

The standard stainless-steel pressure vessel is assembled by a sample inner cup within a reactor well possessing 50 mL volume for reactant loading. A quartz window configured is deposited in top plate to transit the external light source. Gas inlet and gas outlet are for reaction gas loading and unloading. Safety release valve is for security assurance. Electronic pressure gauge is for gas-pressure display.

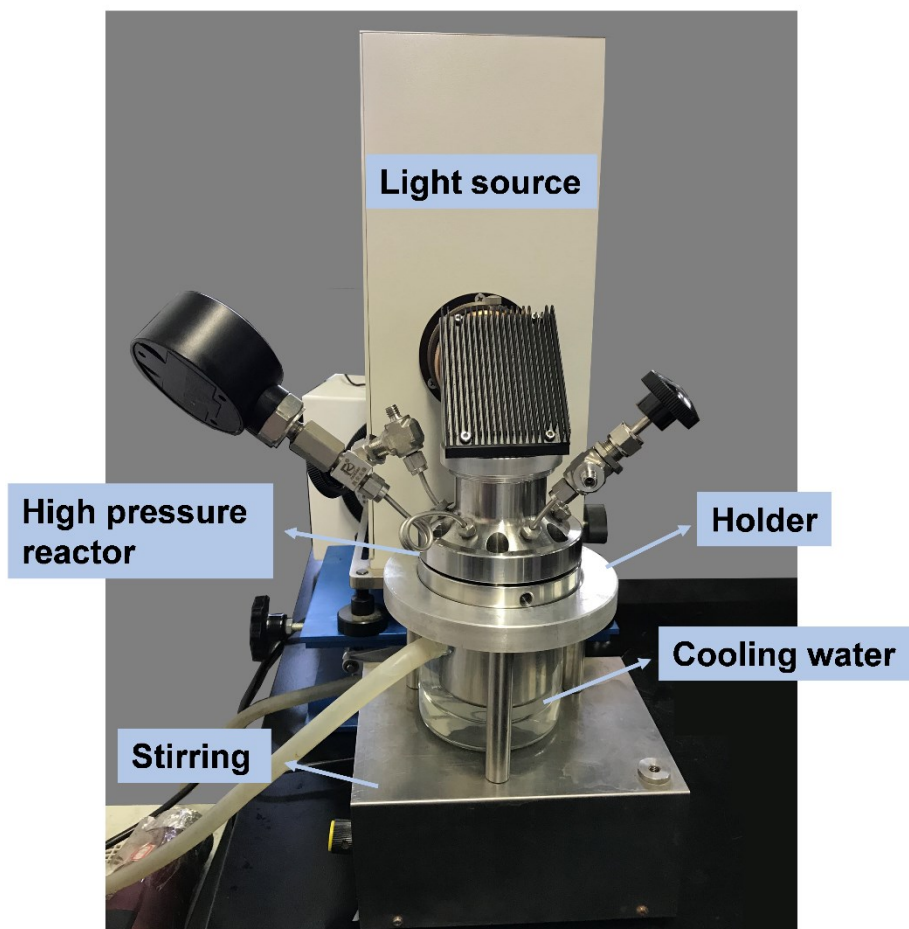

Fig. S5 Detailed illustration of the photocatalytic CH<sub>4</sub> oxidation reaction setup.

The photocatalytic CH<sub>4</sub> oxidation reaction setup contains light source, high pressure reactor, reactor holder, cooling water circulation and stirring apparatus.

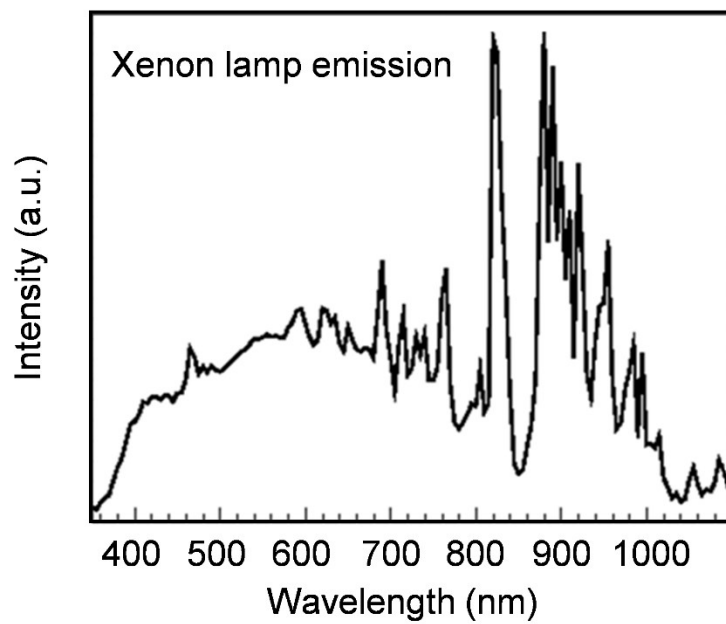

Fig. S6 Full light spectrum emission of Xenon lamp.

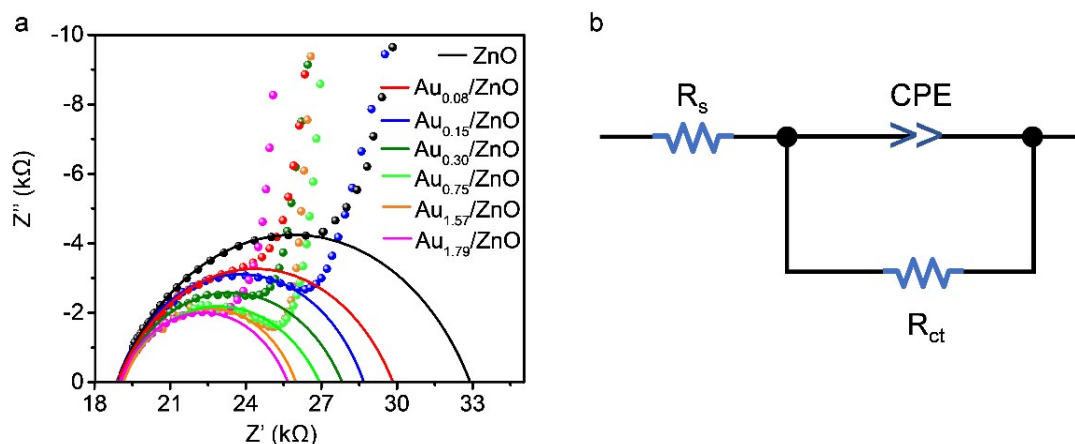

Fig. S7 (a) EIS plots of  $Au_x/ZnO$  ( $x=0, 0.08, 0.15, 0.30, 0.75, 1.57$  and  $1.79$ ) measured at  $10\text{ mV}$  (vs.  $Ag/AgCl$ ) in  $1\text{ M Na}_2\text{SO}_4$  solution under dark conditions. The semicircles of Nyquist plots have been fitted to demonstrate the accurate  $R_{ct}$  values with (b) corresponding equivalent circuit diagram.  $R_s$ , CPE and  $R_{ct}$  represent solution resistance, constant phase angle element and faraday impedance, respectively.

Electrochemical impedance spectroscopy (EIS) measurements were conducted in  $1\text{ M Na}_2\text{SO}_4$  solution by a CHI 760E electrochemical workstation as shown in Fig. S7. In order to accurately calculate the faraday impedance ( $R_{ct}$ ), the semicircles of Nyquist plots have been fitted using the ZView software (Fig. S7a) with corresponding equivalent circuit diagram (Fig. S7b) sketched. As shown in Fig. S7a, along with the increasing amount of Au, the arc radius of  $Au_x/ZnO$  ( $x=0, 0.08, 0.15, 0.30, 0.75, 1.57$  and  $1.79\text{ wt}\%$ ) decreases continuously, indicating the enhanced conductivity. Besides, through the equivalent circuit simulations, the  $R_{ct}$  values of ZnO,  $Au_{0.08}/ZnO$ ,  $Au_{0.15}/ZnO$ ,  $Au_{0.30}/ZnO$ ,  $Au_{0.75}/ZnO$ ,  $Au_{1.57}/ZnO$  and  $Au_{1.79}/ZnO$  are demonstrated to be  $14.0, 10.9, 9.8, 8.9, 8.0, 7.2$  and  $7.0\text{ k}\Omega$ , respectively. Compared to pristine ZnO, the smaller  $R_{ct}$  value of Au loaded ZnO represents the faster electronic transmission characteristic, which is benefit for the separation of photo-generated carriers.



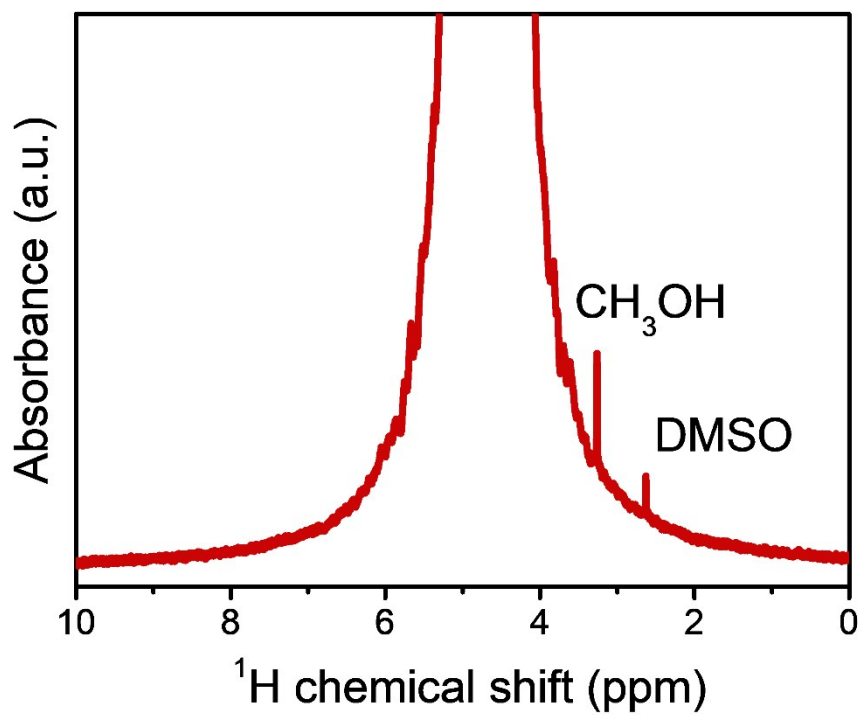

Fig. S8 <sup>1</sup>H NMR of CH<sub>4</sub> oxidation product over Au<sub>0.75</sub>/ZnO. DMSO was added as internal standard in NMR test. <sup>1</sup>H NMR peak of CH<sub>3</sub>OH is 3.28 ppm.

Only CH<sub>3</sub>OH as product has been observed in photocatalytic CH<sub>4</sub> oxidation of Au<sub>0.75</sub>/ZnO from <sup>1</sup>H NMR spectrum. The chemical shift at 3.28 ppm is <sup>1</sup>H NMR characteristic peak of CH<sub>3</sub>OH, no CH<sub>3</sub>OOH peak (3.78 ppm) is observed.

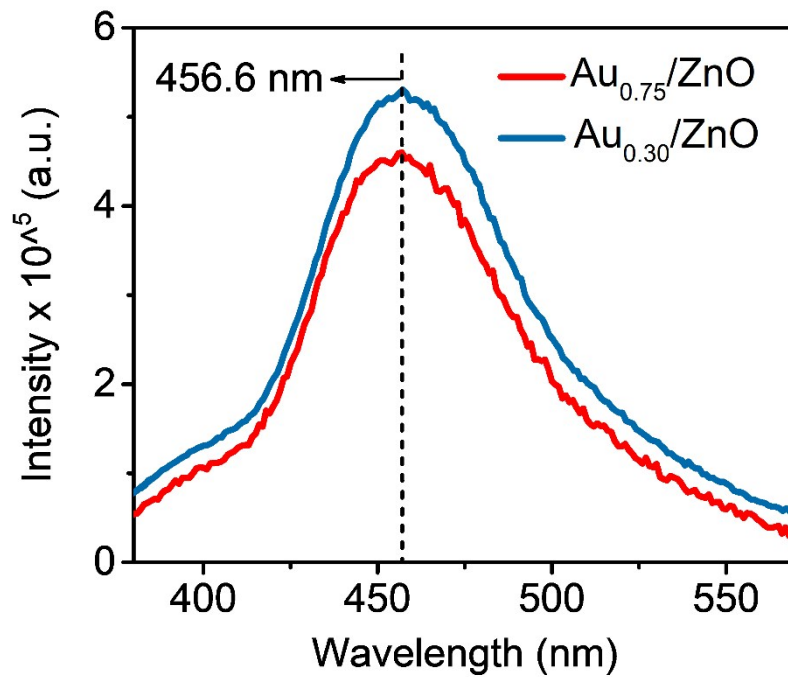

Fig. S9 Fluorescence spectra of 1 mM coumarin solution over Au<sub>0.75</sub>/ZnO and Au<sub>0.30</sub>/ZnO with the incorporation of 5 bar O<sub>2</sub>. The fluorescence peaks are located at 456.6 nm under 332 nm excitation.

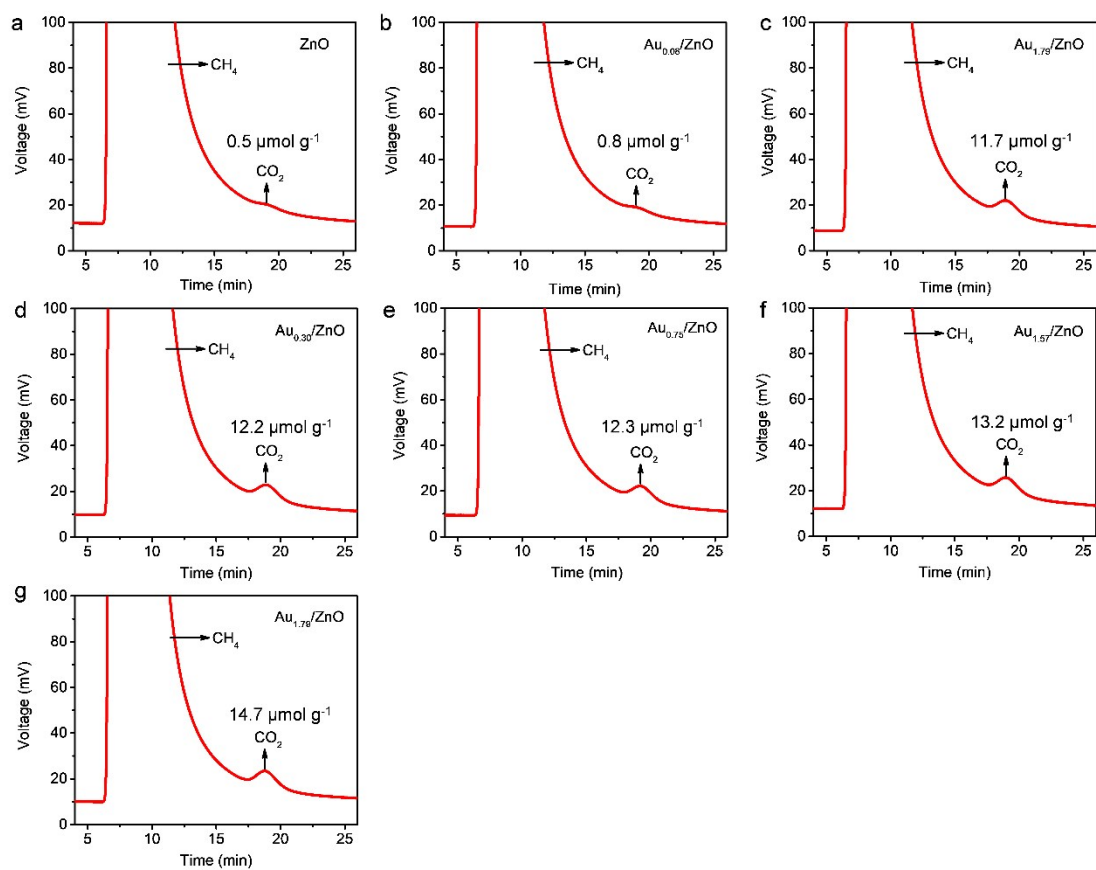

Fig. S10 GC spectra of  $\text{CO}_2$  produced over (a) ZnO, (b)  $\text{Au}_{0.08}/\text{ZnO}$ , (c)  $\text{Au}_{0.15}/\text{ZnO}$ , (d)  $\text{Au}_{0.30}/\text{ZnO}$ , (e)  $\text{Au}_{0.75}/\text{ZnO}$ , (f)  $\text{Au}_{1.57}/\text{ZnO}$  and (g)  $\text{Au}_{1.79}/\text{ZnO}$  in photocatalytic  $\text{CH}_4$  conversion.

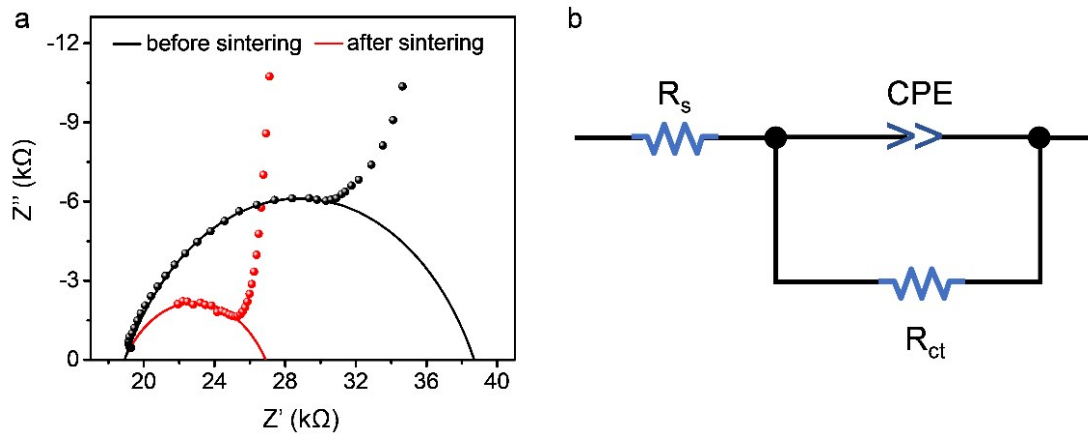

Fig. S11 (a) EIS plots of  $Au_{0.75}/ZnO$  before and after 500 °C calcination, which have been measured at 10 mV (vs.  $Ag/AgCl$ ) in 1 M  $Na_2SO_4$  solution under dark conditions. The semicircles of Nyquist plots have been fitted to demonstrate the accurate  $R_{ct}$  values with (b) corresponding equivalent circuit diagram.  $R_s$ , CPE and  $R_{ct}$  represent solution resistance, constant phase angle element and faraday impedance, respectively.

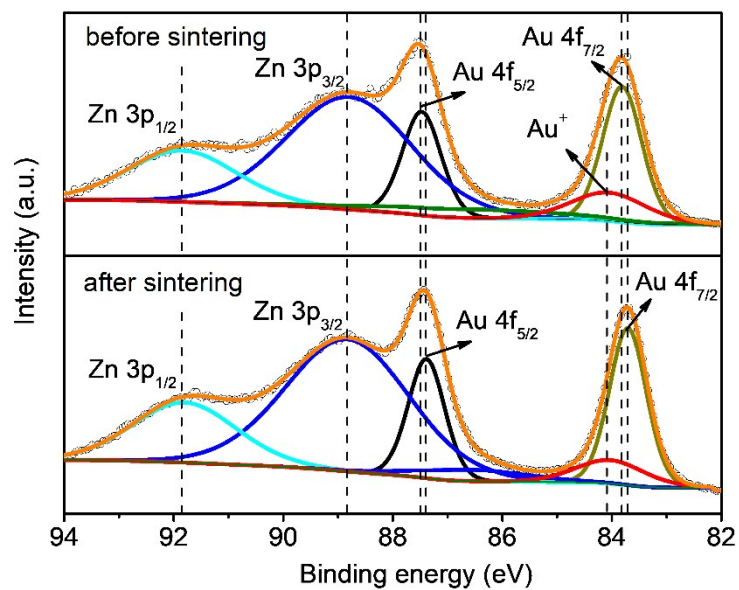

Fig. S12 XPS spectra of Au 4f and Zn 3p from the surface of  $\text{Au}_{0.75}/\text{ZnO}$  before and after 500 °C calcination.

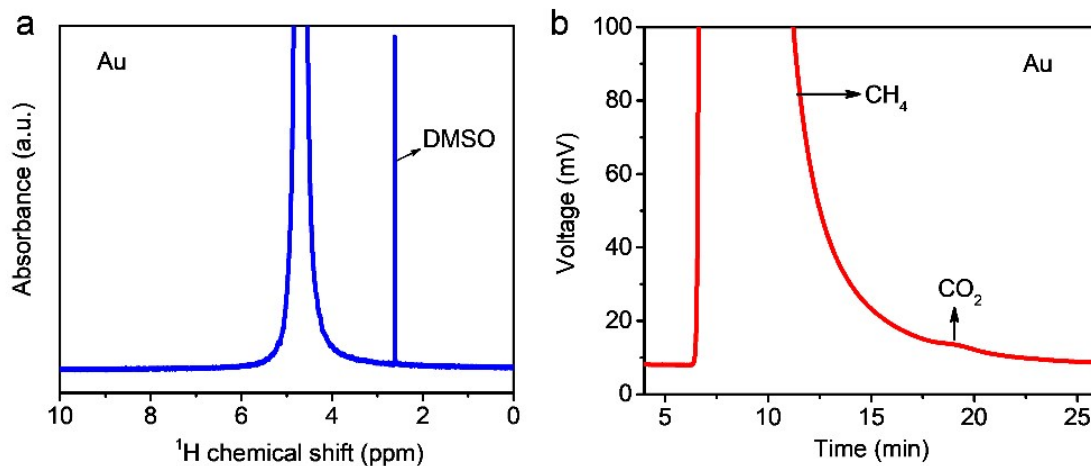

Fig. S13 (a) No liquid product has been found in  $^1\text{H}$  NMR spectrum taking Au as photocatalyst. DMSO was added as internal standard in NMR test. (b) GC spectrum of the gas phase product taking Au as photocatalyst, and only  $0.2 \mu\text{mol g}^{-1}$  of  $\text{CO}_2$  has been observed.

For photocatalytic  $\text{CH}_4$  oxidation, 10 mg of Au sample was suspended in 10 mL deionized water under stirring. The reactor was sealed and purged with a  $\text{CH}_4/\text{O}_2$  mixing gas with 15 and 5 bar, respectively. During the light irradiation (2h), the reaction temperature was maintained at  $30^\circ\text{C}$  using a cooling water bath. After photocatalytic  $\text{CH}_4$  reaction, the liquid and gas products were collected and tested by NMR and GC spectra, respectively. No liquid product and only  $0.2 \mu\text{mol g}^{-1}$  of  $\text{CO}_2$  have been found as shown in Fig. S13a, b.

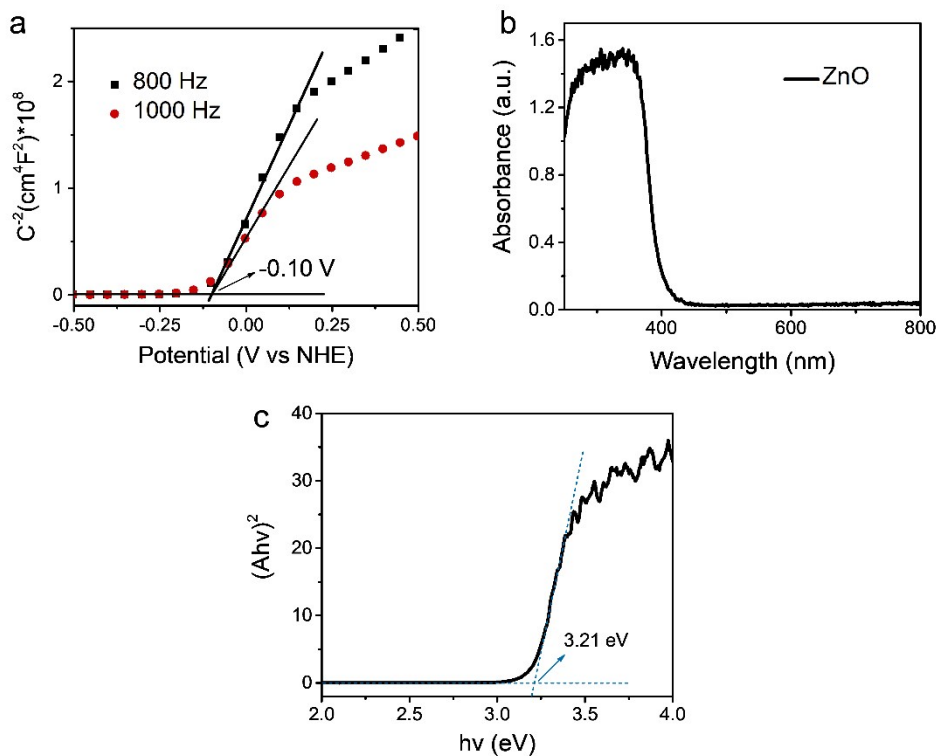

Fig. S14 (a) Mott-Schottky curves of ZnO under frequencies of 800 and 1000 Hz. (b) UV-Vis diffuse reflectance spectrum of pristine ZnO with (c) the transformed Kubelka-Munk plot, respectively.

The band structure of ZnO has been accurately explore through Mott-Schottky plots (Fig.S14a), UV-Vis diffuse reflectance spectra (Fig.S14b) and transformed Kubelka-Munk function plots (Fig.S14c). Bandgap value of ZnO is calculated to be 3.21 V vs. NHE via Kubelka-Munk function plot in Fig. S14c, which transformed from the UV-Vis absorption spectra in Fig. S14b. Flat conduction band potential of ZnO is revealed to be -0.10 eV vs. NHE through Mott-Schottky plots at frequencies 800 Hz and 1000 Hz in Fig. S14a. Then, deriving from the values between flat conduction band and bandgap, the valence band potential of ZnO is calculated be to 3.11 V vs. NHE.

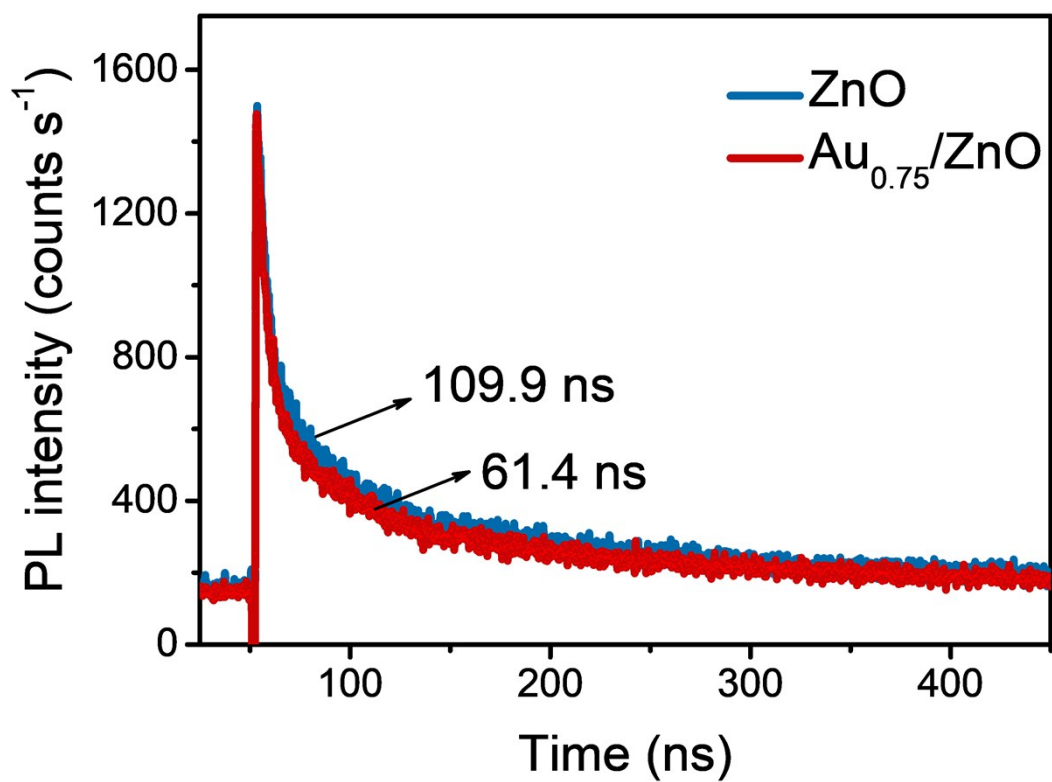

Fig. S15 (a) Time-resolved PL spectra for fresh ZnO and Au<sub>0.75</sub>/ZnO nanocrystals under 344 nm excitation.

Comparing to ZnO (109.9 ns), the descent of emission lifetime of Au<sub>0.75</sub>/ZnO (61.4 ns) is attributed to the decreased conduction electrons within ZnO, which has been transferred into adjacent Au.



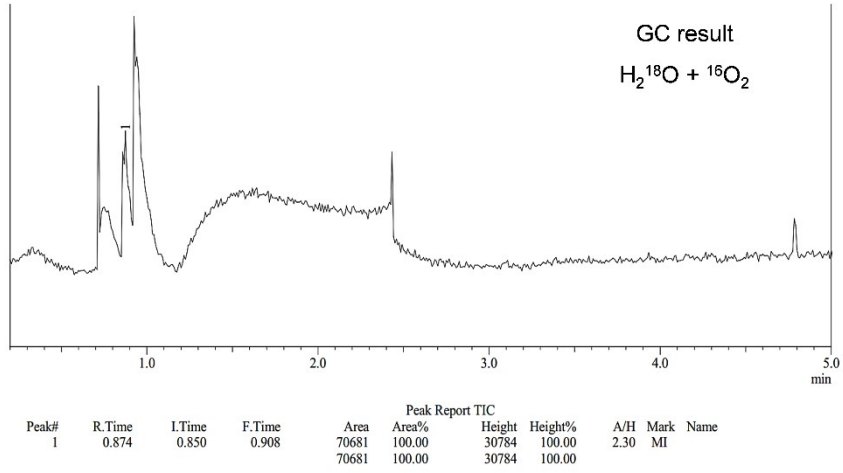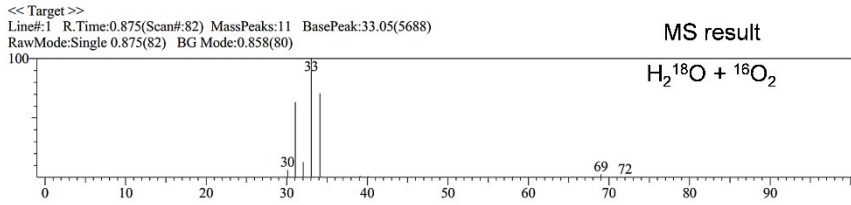

Fig. S16 Primary results of GC-MS analyses in H<sub>2</sub><sup>18</sup>O + <sup>16</sup>O<sub>2</sub> system.

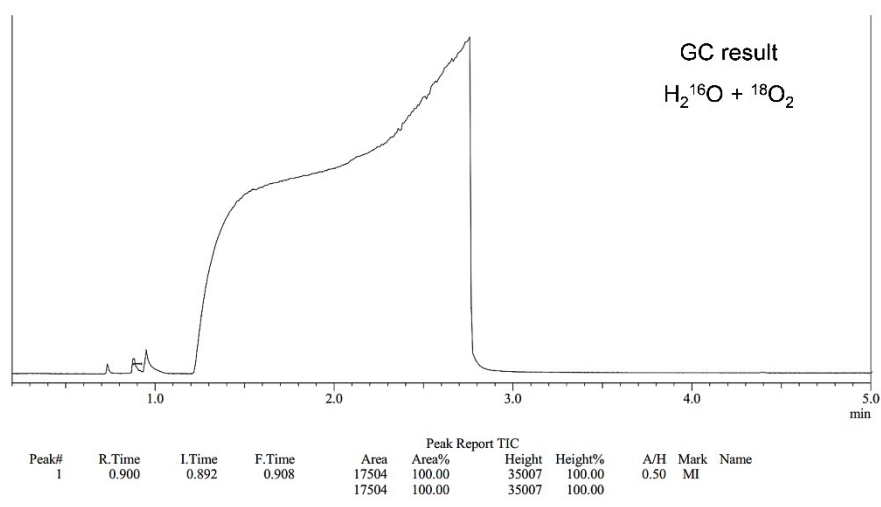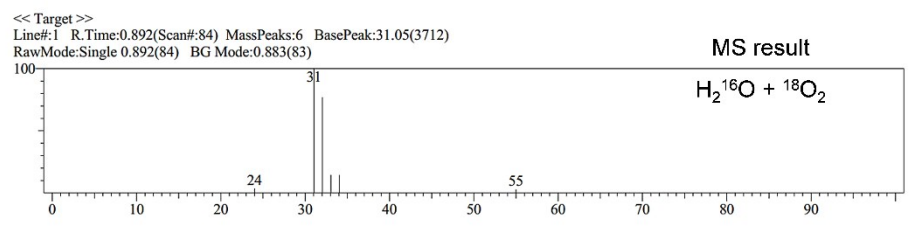

Fig. S17 Primary results of GC-MS analyses in  $H_2^{16}O + ^{18}O_2$  system.

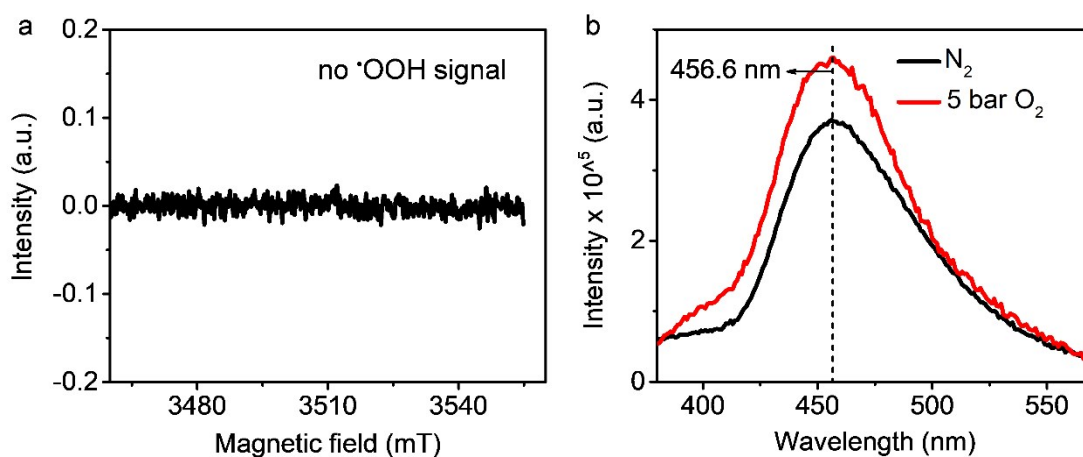

Fig. S18 (a) ESR spectrum of  $\text{Au}_{0.75}/\text{ZnO}$  with  $\text{O}_2$  dissolved in methanol. DMPO has been added in solution as the radical trapping agent of  $\cdot\text{OOH}$ . (b) Fluorescence spectra of 1 mM coumarin solution over  $\text{Au}_{0.75}/\text{ZnO}$  with or without  $\text{O}_2$  incorporation. The fluorescence peaks are located at 456.6 nm under 332 nm excitation.

Different from the reported work that  $\text{O}_2$  was the only O-source of  $\text{CH}_3\text{OH}$ , we find that  $\text{H}_2\text{O}$  has provided more O-atoms than  $\text{O}_2$  for the formation of  $\text{CH}_3\text{OH}$ . We think that the light source, including wavelength and light intensity, as well as the loading amount of Au should bear the most responsibility for the mechanistic differences. In our work, due to the lower energy input of light source (full light spectrum,  $100 \text{ mW cm}^{-2}$ , Fig. S6) than the previous report (UV irradiation,  $100 \text{ mW cm}^{-2}$ )<sup>1</sup>,  $\text{O}_2$  can be more readily reduced to  $\cdot\text{OH}$  (0.695 V vs. NHE) rather than  $\cdot\text{OOH}$  (-0.046 V vs. NHE), as no  $\cdot\text{OOH}$  is observed in the ESR spectrum (Fig. S18a). Therefore,  $\text{O}_2$  cannot engage in the formation of  $\text{CH}_3\text{OH}$  through the  $\cdot\text{OOH}$  path, which reduces the chance of  $\text{O}_2$  as the O-source of  $\text{CH}_3\text{OH}$ . As mentioned above,  $\cdot\text{OH}$  plays two roles in the oxidation of  $\text{CH}_4$ , one is to active  $\text{CH}_4$  into  $\cdot\text{CH}_3$  (step 2, Fig. 3), other is combined with  $\cdot\text{CH}_3$  to form  $\text{CH}_3\text{OH}$  (step 3, Fig. 3). And the  $\cdot\text{OH}$  can be produced through both  $\text{H}_2\text{O}$  oxidation and  $\text{O}_2$  reduction. Thus, the separate contributions of  $\cdot\text{OH}$  generation, from  $\text{H}_2\text{O}$  oxidation or  $\text{O}_2$  reduction, have been investigated by fluorescence spectra of coumarin solution with and without  $\text{O}_2$  (Fig. S18b). From the peak intensity analysis of fluorescence spectra, we can find that  $\text{O}_2$  offers less than 17.4 % enhancement in the formation of  $\cdot\text{OH}$ . This is because the consumption of electrons can accelerate the generation of holes to oxidize  $\text{H}_2\text{O}$  into  $\cdot\text{OH}$ . Thus, more than 82.6 % of  $\cdot\text{OH}$  is generated by  $\text{H}_2\text{O}$  oxidation. Therefore, the O-atom of  $\text{CH}_3\text{OH}$  mainly comes from  $\text{H}_2\text{O}$  as shown in the results of GC-MS (Fig. 6a). Since no  $\text{CH}_3\text{OOH}$  is observed in the products of  $\text{Au}_{0.75}/\text{ZnO}$ , we can deduce that little  $\text{O}_2$  has engaged in the generation of  $\text{CH}_3\text{OH}$  through step 4. But step 4 is fitting for the generation of  $\text{CH}_3\text{OH}$  when the loading amount of Au less than 0.75 wt%.

Table S1. Comparisons of photocatalytic activities of ZnO and Au<sub>x</sub>/ZnO (x= 0.08, 0.15, 0.30, 0.75, 1.57 and 1.79) for CH<sub>4</sub> conversion.

| entry | photocatalyst           | productivity ( $\mu\text{mol g}^{-1}$ ) |                     |                 | CH <sub>3</sub> OH selectivity in liquid products (%) | CH <sub>3</sub> OH selectivity in all products (%) |
|-------|-------------------------|-----------------------------------------|---------------------|-----------------|-------------------------------------------------------|----------------------------------------------------|
|       |                         | CH <sub>3</sub> OH                      | CH <sub>3</sub> OOH | CO <sub>2</sub> |                                                       |                                                    |
| 1     | ZnO                     | 178                                     | 135                 | 0.5             | 56.9                                                  | 56.8                                               |
| 2     | Au <sub>0.08</sub> /ZnO | 343                                     | 297                 | 0.8             | 53.6                                                  | 53.5                                               |
| 3     | Au <sub>0.15</sub> /ZnO | 951                                     | 1082                | 11.7            | 46.8                                                  | 46.5                                               |
| 4     | Au <sub>0.30</sub> /ZnO | 1996                                    | 407                 | 12.2            | 83.1                                                  | 82.7                                               |
| 5     | Au <sub>0.75</sub> /ZnO | 1371                                    | 0                   | 12.3            | 100                                                   | 99.1                                               |
| 6     | Au <sub>1.57</sub> /ZnO | 1197                                    | 0                   | 13.2            | 100                                                   | 98.9                                               |
| 7     | Au <sub>1.79</sub> /ZnO | 1173                                    | 0                   | 14.7            | 100                                                   | 98.8                                               |

Reaction conditions: 10 mg catalyst, 10 mL H<sub>2</sub>O, 5 bar O<sub>2</sub> and 15 bar CH<sub>4</sub>, 30 °C reaction temperature, 2 h reaction time, light source: Xenon full light irradiation, light intensity 100 mW cm<sup>-2</sup>. CH<sub>3</sub>OH selectivity in liquid products (%) = productivity of CH<sub>3</sub>OH  $\times$  100 / (productivity of CH<sub>3</sub>OOH + productivity of CH<sub>3</sub>OH). CH<sub>3</sub>OH selectivity in all products (%) = productivity of CH<sub>3</sub>OH  $\times$  100 / (productivity of CH<sub>3</sub>OOH + productivity of CH<sub>3</sub>OH + productivity of CO<sub>2</sub>).

Table S2. The comparisons of CH<sub>3</sub>OH selectivities over Au<sub>0.75</sub>/ZnO with other reported photocatalysts.

| catalyst                                                  | reaction condition                                                                                                           |                  |                                                                          | CH <sub>3</sub> OH productivity<br>( $\mu\text{mol g}^{-1}$ ) | STY of CH <sub>3</sub> OH<br>( $\mu\text{mol g}^{-1} \text{h}^{-1}$ ) | CH <sub>3</sub> OH selectivity<br>(%) | ref.                                                            |
|-----------------------------------------------------------|------------------------------------------------------------------------------------------------------------------------------|------------------|--------------------------------------------------------------------------|---------------------------------------------------------------|-----------------------------------------------------------------------|---------------------------------------|-----------------------------------------------------------------|
|                                                           | reactants                                                                                                                    | T (°C)           | light                                                                    |                                                               |                                                                       |                                       |                                                                 |
| Au <sub>0.75</sub> /ZnO                                   | <i>P</i> <sub>CH<sub>4</sub></sub> = 15 bar;<br><i>P</i> <sub>O<sub>2</sub></sub> = 5 bar;<br><i>Cat.</i> : 10 mg            | 30               | 300 nm < $\lambda$ < 1200 nm;<br>light intensity 100 mW cm <sup>-2</sup> | 1371                                                          | 685.5                                                                 | 99.1                                  | My work                                                         |
| 0.1 wt %<br>Au/ZnO                                        | <i>P</i> <sub>CH<sub>4</sub></sub> = 20 bar;<br><i>P</i> <sub>O<sub>2</sub></sub> = 1 bar;<br><i>Cat.</i> : 10 mg            | 25 ± 2           | 300 nm < $\lambda$ < 500 nm; light<br>intensity 100 mW cm <sup>-2</sup>  | 4120                                                          | 2060                                                                  | 15.7                                  | <i>J. Am. Chem. Soc.</i><br>2019, <b>141</b> , 20507-<br>20515  |
| Cu-0.5/<br>PCN                                            | <i>P</i> <sub>CH<sub>4</sub></sub> = 1 bar;<br><i>Cat.</i> : 20 mg                                                           | room temperature | visible light                                                            | 24.5                                                          | 24.5                                                                  | 18.8                                  | <i>Nat. Commun.</i><br>2019, <b>10</b> , 506                    |
| 0.33 metal<br>wt.% FeO <sub>x</sub> /<br>TiO <sub>2</sub> | <i>P</i> <sub>CH<sub>4</sub></sub> = 1 bar;<br><i>V</i> <sub>H<sub>2</sub>O<sub>2</sub></sub> = 4 mL;<br><i>Cat.</i> : 10 mg | 25               | 300 nm < $\lambda$ < 710 nm                                              | 1056                                                          | 352                                                                   | 90                                    | <i>Nat. Catal.</i> 2018, <b>1</b> ,<br>889–896                  |
| WO <sub>3</sub> /La                                       | <i>P</i> <sub>CH<sub>4</sub></sub> = 1 bar;<br><i>Cat.</i> : 0.3 g                                                           | 55               | medium-pressure Hg lamp                                                  | ~ 64.7                                                        | ~32.3                                                                 | ~47.1                                 | <i>Appl. Catal. B-<br/>Environ.</i> 2016, <b>187</b> ,<br>30-36 |
| Ag-ZnO                                                    | 78.9% N <sub>2</sub> , 21.1% O <sub>2</sub> and<br>100 p.p.m. CH <sub>4</sub> ;<br><i>Cat.</i> : 0.5 g                       | 0 or 80          | 300 nm < $\lambda$ < 1200 nm;<br>light intensity 200 mW cm <sup>-2</sup> | none                                                          | none                                                                  | none                                  | <i>Nat. Commun.</i><br>2016, <b>7</b> , 12273-<br>12280         |

STY: a space-time yield is a vital benchmark for CH<sub>3</sub>OH yield assessment taken reaction time into consideration. Though lower productivity of CH<sub>3</sub>OH is obtained in our work compared to that of *J. Am. Chem. Soc.* 2019, **141**, 20507-20515, the selectivity is highest with 99.11 %, and the reaction conditions are much milder with low CH<sub>4</sub> pressure and applicable light irradiation range.

## References

1. H. Song, X. Meng, S. Wang, W. Zhou, X. Wang, T. Kako and J. Ye, *J. Am. Chem. Soc.*, 2019, **141**, 20507-20515.
